# Supplementary material for: Hydrothermal syntheses and characterization of a series of luminescent Cd(ii) frameworks with pyridine-based and benzene-based bis-triazole ligands
Source: Royal Society of Chemistry journal article supplement (doi:10.1039/c3ce26998a), 2013-01-01
Supplement: c3ce26998a.pdf [file c3ce26998a.pdf]

## Supporting information

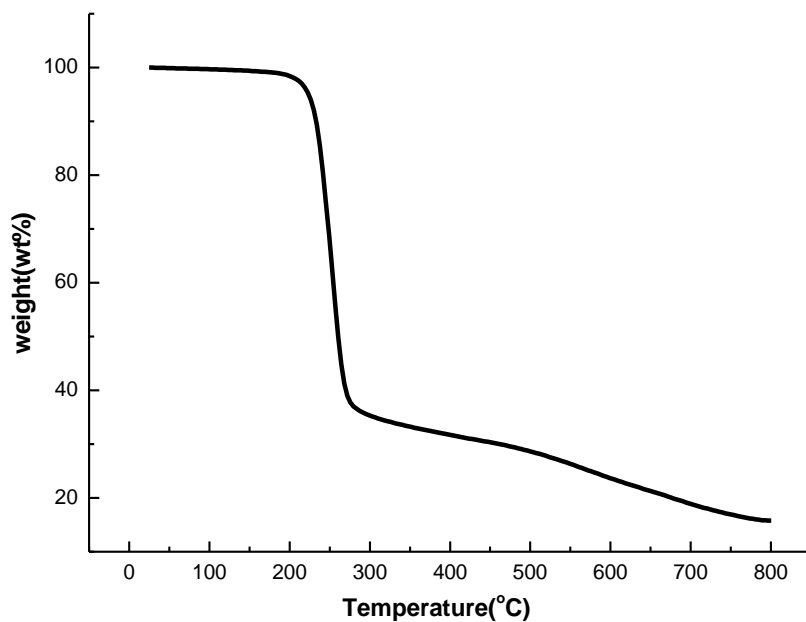

Figure S1 TGA curve of 1.

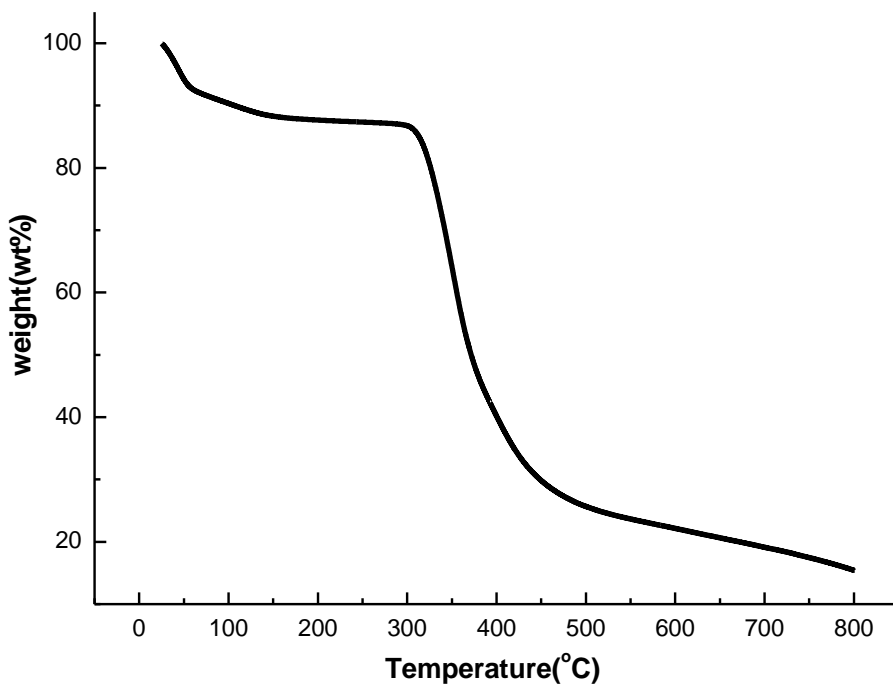

Figure S2 TGA curve of 2.

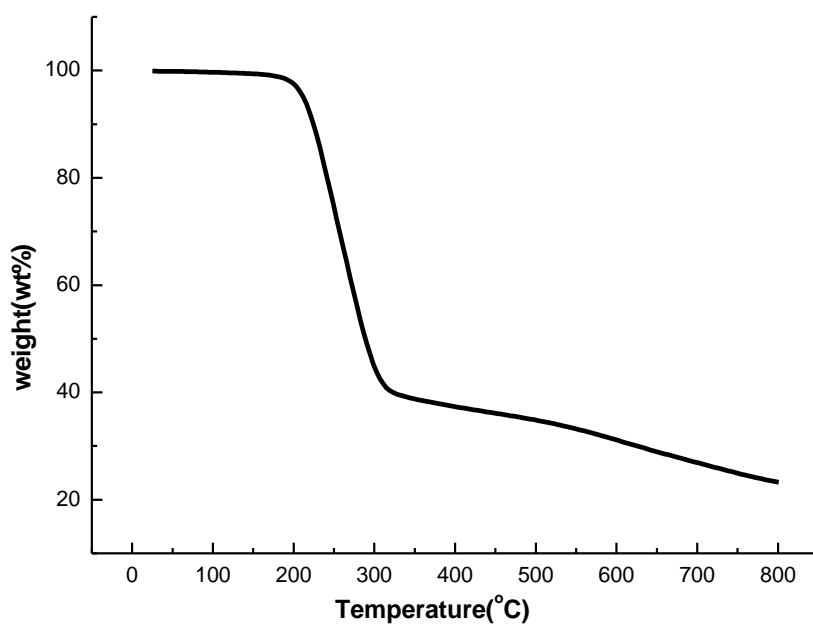

Figure S3 TGA curve of **3**.

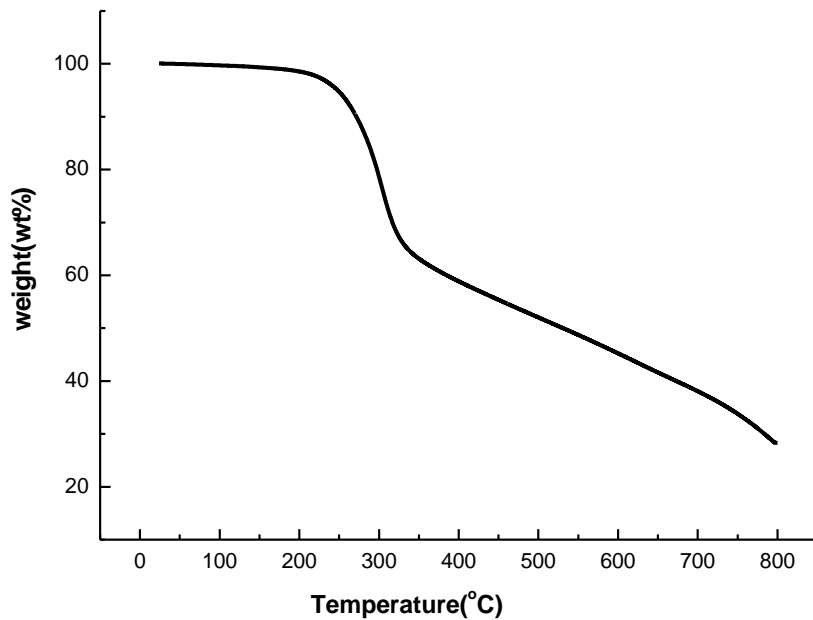

Figure S4 TGA curve of **4**.

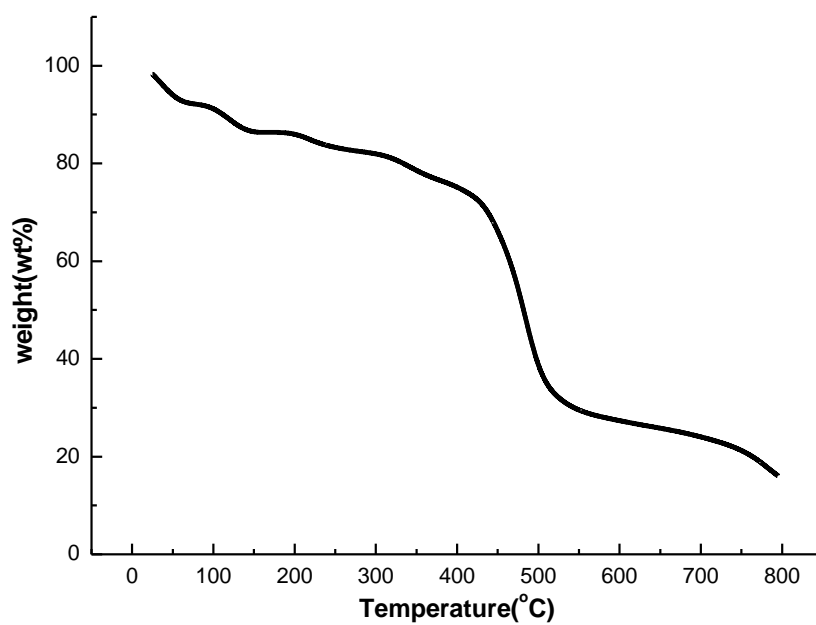

Figure S5 TGA curve of **5**.

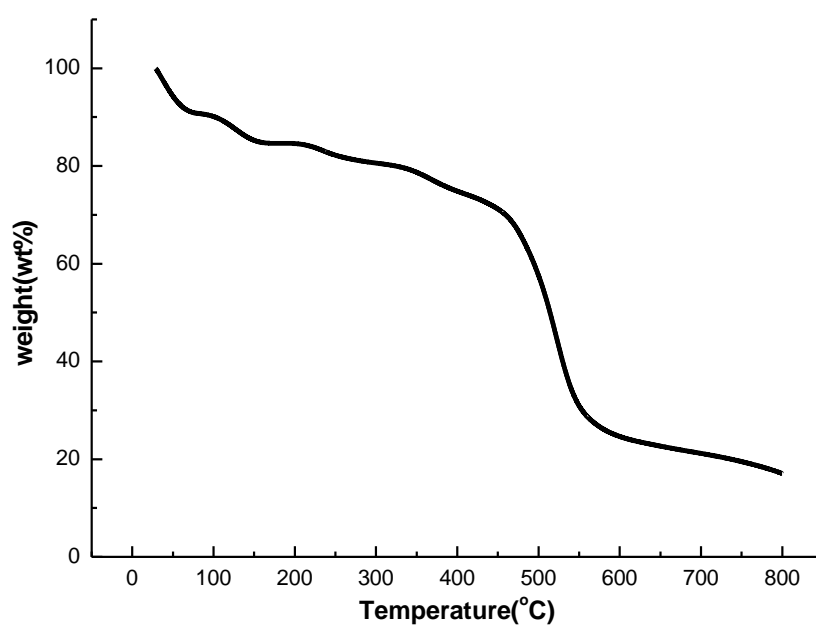

Figure S5 TGA curve of **6**.

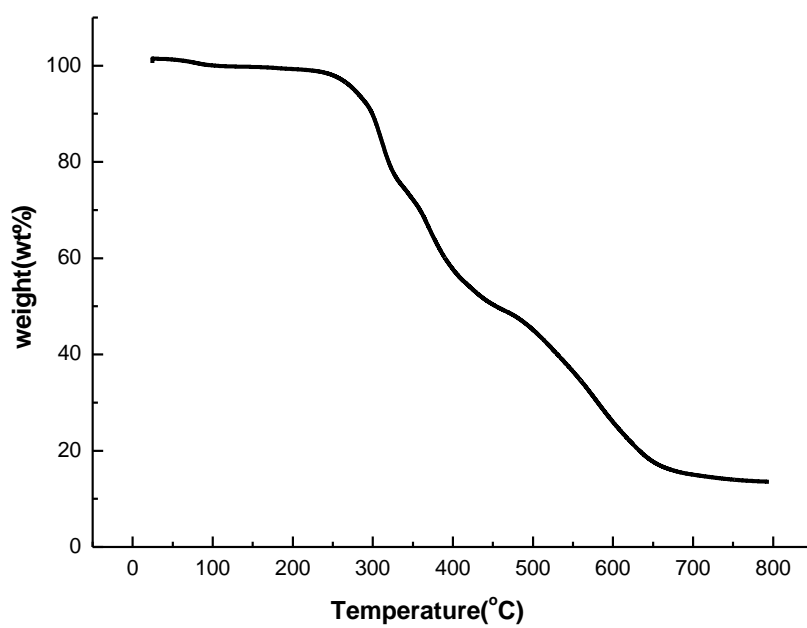

Figure S7 TGA curve of **7**.

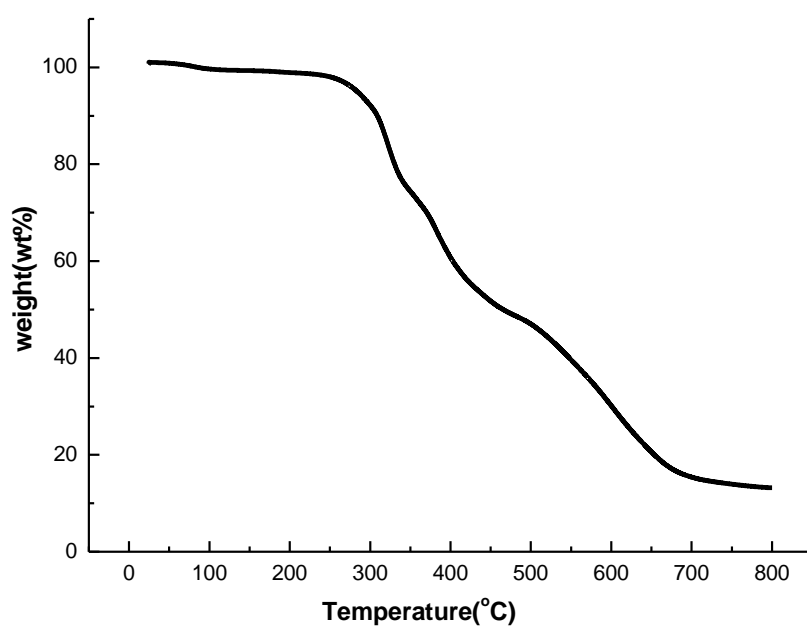

Figure S8 TGA curve of **8**.
